# Supplementary material for: The reaction of organic peroxy radicals with unsaturated compounds controlled by a non-epoxide pathway under atmospheric conditions
Source: Royal Society of Chemistry journal article supplement (doi:10.1039/d2cp05166d), 2023-01-01

## Electronic Supplementary Information

### The Reaction of Organic Peroxy Radicals with Unsaturated Compounds Controlled by a non-Epoxyde Pathway under Atmospheric Conditions

By Barbara Nozière,<sup>a</sup> Olivier Durif,<sup>a</sup> Eloé Dubus,<sup>a</sup> Stephanie Kylington,<sup>a</sup> Åsa Emmer,<sup>a</sup> Fabienne Fache,<sup>b</sup> Felix Piel,<sup>c</sup> and Armin Wisthaler<sup>c</sup>

<sup>a</sup> KTH, Royal Institute of Technology, Department of Chemistry, 114 28 Stockholm, Sweden

<sup>b</sup> Université Lyon 1 and CNRS, UMR 5246, ICBMS, 69626 Villeurbanne, France

<sup>c</sup> University of Oslo, Department of Chemistry, 0315 Oslo, Norway

#### Table of Contents

|                                                                                                                                              |    |
|----------------------------------------------------------------------------------------------------------------------------------------------|----|
| Table S1: List of the experiments and experimental conditions. All the concentrations are in molecule cm. <sup>-3</sup> .....                | 2  |
| Table S2: Main ions in the experiments C <sub>5</sub> H <sub>11</sub> O <sub>2</sub> + 2,3 DM2B .....                                        | 3  |
| Table S3: Main ions in the experiments C <sub>5</sub> H <sub>11</sub> O <sub>2</sub> + isoprene. ....                                        | 4  |
| Table S4: Main ions in the experiments CH <sub>3</sub> O <sub>2</sub> + 2,3DM2B. ....                                                        | 5  |
| Figure S5: Time-profiles and variations of the main aldehydes with alkene concentration in the experiments. ....                             | 6  |
| Figure S6: Chromatograms. ....                                                                                                               | 9  |
| Figure S7: GC/MS analysis: Evolution of the concentration of 1-pentanal and tetramethyloxirane. ....                                         | 10 |
| Section S8: Kinetic simulations .....                                                                                                        | 11 |
| <b>Table S8.1:</b> Rate coefficients used in the simulations .....                                                                           | 11 |
| <b>Table S8.2:</b> Results of the kinetic simulations .....                                                                                  | 11 |
| Figure S9: NMR spectra for the 2,3DM2B and isoprene samples. ....                                                                            | 13 |
| Section S10: Kinetic analyses of the ion signals in the reactions RO <sub>2</sub> + alkene. ....                                             | 14 |
| Figure S10B1: Evolution of the ion <i>m/z</i> = 127.112 in C <sub>5</sub> H <sub>11</sub> O <sub>2</sub> + 2,3DM2B experiment (Alk38).....   | 14 |
| Figure S10B2: Kinetic plot for Fig. S10B1.....                                                                                               | 14 |
| Figure S10B3: Evolution of the ion <i>m/z</i> = 119.034 in C <sub>5</sub> H <sub>11</sub> O <sub>2</sub> + isoprene experiment (Alk44). .... | 15 |
| Figure S10B4: Kinetic plot for Fig. S10B3.....                                                                                               | 15 |
| Figure S10B5: Evolution of the ion <i>m/z</i> = 85.065 in CH <sub>3</sub> O <sub>2</sub> + 2,3DM2B experiment (Alk46). ....                  | 16 |
| Figure S10B6: Kinetic plot for Fig. S10B5.....                                                                                               | 16 |
| Figure S11: Chromatograms of potential reaction products. ....                                                                               | 17 |
| Section S12: Potential effects on RO <sub>2</sub> +alkene reactions in chamber experiments (kinetic simulations) .....                       | 18 |

**Table S1:** List of the experiments and experimental conditions. All the concentrations are in cm.<sup>-3</sup>

3

| <b>C<sub>5</sub>H<sub>11</sub>O<sub>2</sub> + 2,3DMB</b>                                  |                              |                                      |                                                                                                                                                          |
|-------------------------------------------------------------------------------------------|------------------------------|--------------------------------------|----------------------------------------------------------------------------------------------------------------------------------------------------------|
| <b>Expt. n°</b>                                                                           | <b>F<sub>air</sub> (sLm)</b> | <b>[C<sub>5</sub>H<sub>11</sub>]</b> | <b>[2,3DMB]</b>                                                                                                                                          |
| <b>PTr-MS FUSION analyses</b>                                                             |                              |                                      |                                                                                                                                                          |
| Alk35                                                                                     | 3.5/1.75                     | 3.4 × 10 <sup>13</sup>               | 2.0 × 10 <sup>13</sup> / 5.1 × 10 <sup>13</sup>                                                                                                          |
| Alk36                                                                                     | 3.5/1.0                      | 3.4 × 10 <sup>13</sup>               | 2.0 × 10 <sup>13</sup> / 5.1 × 10 <sup>13</sup>                                                                                                          |
| Alk37                                                                                     | 3.0/1.0                      | 6.0 × 10 <sup>13</sup>               | 7.2×10 <sup>13</sup> / 1.4×10 <sup>14</sup> / 1.8×10 <sup>14</sup> / 2.7×10 <sup>14</sup>                                                                |
| Alk38                                                                                     | 3.0/1.0                      | 6.0 × 10 <sup>13</sup>               | 7.2×10 <sup>13</sup> / 1.4×10 <sup>14</sup> / 1.8×10 <sup>14</sup> / 2.7×10 <sup>14</sup>                                                                |
| Alk48                                                                                     | 1.0                          | 6.0 × 10 <sup>13</sup>               | 7.2×10 <sup>13</sup> / 1.4×10 <sup>14</sup> / 1.8×10 <sup>14</sup> / 2.7×10 <sup>14</sup>                                                                |
| <b>GC/MS analyses</b>                                                                     |                              |                                      |                                                                                                                                                          |
| Alk39                                                                                     | 3.0/1.0                      | 6.0 × 10 <sup>13</sup>               | sample 3: Lights OFF, 2.7 × 10 <sup>14</sup><br>samples 4 and 6: Lights ON, 2.7 × 10 <sup>14</sup><br>samples 5 and 7: Lights ON, 7.2 × 10 <sup>13</sup> |
| Alk40                                                                                     | 3.0/1.0                      | 6.0 × 10 <sup>13</sup>               | sample 3: Lights OFF, 2.7 × 10 <sup>14</sup><br>samples 4 and 6: Lights ON, 2.7 × 10 <sup>14</sup><br>samples 5 and 7: Lights ON, 7.2 × 10 <sup>13</sup> |
| <b>C<sub>5</sub>H<sub>11</sub>O<sub>2</sub>, + isoprene (PTr-MS FUSION analyses only)</b> |                              |                                      |                                                                                                                                                          |
|                                                                                           |                              | <b>[C<sub>5</sub>H<sub>11</sub>]</b> | <b>[isoprene]</b>                                                                                                                                        |
| Alk41                                                                                     | 3.5/1.0                      | 3.4 × 10 <sup>13</sup>               | 2.3 × 10 <sup>13</sup> / 4.6 × 10 <sup>13</sup>                                                                                                          |
| Alk42                                                                                     | 3.5/1.0                      | 3.4 × 10 <sup>13</sup>               | 4.6 × 10 <sup>13</sup> / 1.2 × 10 <sup>14</sup>                                                                                                          |
| Alk43                                                                                     | 3.0/1.0                      | 3.4 × 10 <sup>13</sup>               | 4.3 × 10 <sup>13</sup> / 6.5 × 10 <sup>13</sup> / 8.6 × 10 <sup>13</sup>                                                                                 |
| Alk44                                                                                     | 3.0/1.0                      | 6.0 × 10 <sup>13</sup>               | 4.3 × 10 <sup>13</sup> / 6.5 × 10 <sup>13</sup> / 8.6 × 10 <sup>13</sup>                                                                                 |
| <b>CH<sub>3</sub>O<sub>2</sub> + 2,3DMB (PTr-MS FUSION analyses only)</b>                 |                              |                                      |                                                                                                                                                          |
|                                                                                           |                              | <b>[CH<sub>3</sub>I]</b>             | <b>[2,3DMB]</b>                                                                                                                                          |
| Alk45                                                                                     | 3.0/1.0                      | 2.3 × 10 <sup>14</sup>               | 1.8×10 <sup>14</sup> / 3.5×10 <sup>14</sup>                                                                                                              |
| Alk46                                                                                     | 3.0/1.0                      | 7.7 × 10 <sup>14</sup>               | 1.4×10 <sup>14</sup> / 1.8×10 <sup>14</sup> / 2.7×10 <sup>14</sup> / 3.5×10 <sup>14</sup>                                                                |
| Alk47                                                                                     | 3.0/1.0                      | 5.5 × 10 <sup>14</sup>               | 1.4×10 <sup>14</sup> / 1.8×10 <sup>14</sup> / 2.7×10 <sup>14</sup> / 3.5×10 <sup>14</sup>                                                                |

**Table S2:** Main ions in the experiments C<sub>5</sub>H<sub>11</sub>O<sub>2</sub> + 2,3 DM2B

| <i>m/z</i>     | Intensity<br>(Baseline/Product)       | Ion sum<br>formula                                           | Neutral sum<br>formula                        | Interpretation and comments                                             |
|----------------|---------------------------------------|--------------------------------------------------------------|-----------------------------------------------|-------------------------------------------------------------------------|
| 19.018         | 10 <sup>5</sup> / -                   | H <sub>3</sub> O <sup>+</sup>                                | H <sub>2</sub> O                              | Source                                                                  |
| 31.018         | 10 <sup>3</sup> / 10 <sup>4</sup>     | CH <sub>2</sub> OH <sup>+</sup>                              | CH <sub>2</sub> O                             | Formaldehyde, product                                                   |
| 43.018         | 10 <sup>4</sup> / 5x10 <sup>4</sup>   | C <sub>2</sub> H <sub>2</sub> OH <sup>+</sup>                | C <sub>2</sub> H <sub>4</sub> O <sub>2</sub>  | Fragment of C <sub>2</sub> H <sub>4</sub> O <sub>2</sub> H <sup>+</sup> |
| 45.033         | - / 5x10 <sup>4</sup>                 | C <sub>2</sub> H <sub>4</sub> OH <sup>+</sup>                | C <sub>2</sub> H <sub>4</sub> O               | Acetaldehyde, product side-chemistry                                    |
| 59.049         | 5x10 <sup>4</sup> / 5x10 <sup>4</sup> | C <sub>3</sub> H <sub>6</sub> OH <sup>+</sup>                | C <sub>3</sub> H <sub>6</sub> O               | Acetone, 2,3DM2B product                                                |
| 61.028         | 10 <sup>4</sup> / 10 <sup>4</sup>     | C <sub>2</sub> H <sub>4</sub> O <sub>2</sub> H <sup>+</sup>  | C <sub>2</sub> H <sub>4</sub> O <sub>2</sub>  | Acetic acid/hydroxyacetaldehyde, product                                |
| 67.054         | 10 <sup>4</sup> / 10 <sup>4</sup>     | C <sub>5</sub> H <sub>7</sub> <sup>+</sup>                   | /                                             | Fragment, autoxidation C <sub>5</sub> H <sub>11</sub> O <sub>2</sub>    |
| 69.070         | 10 <sup>5</sup> / 5x10 <sup>4</sup>   | C <sub>5</sub> H <sub>8</sub> H <sup>+</sup>                 | /                                             | Fragment, autoxidation C <sub>5</sub> H <sub>11</sub> O <sub>2</sub>    |
| 71.049         | 5x10 <sup>3</sup> / 10 <sup>4</sup>   | C <sub>4</sub> H <sub>6</sub> OH <sup>+</sup>                | /                                             | Fragment, autoxidation C <sub>5</sub> H <sub>11</sub> O <sub>2</sub>    |
| 83.049         | 5x10 <sup>3</sup> / 10 <sup>4</sup>   | C <sub>5</sub> H <sub>6</sub> OH <sup>+</sup>                | /                                             | Fragment, autoxidation C <sub>5</sub> H <sub>11</sub> O <sub>2</sub>    |
| 85.065         | 10 <sup>4</sup> / 10 <sup>4</sup>     | C <sub>5</sub> H <sub>8</sub> OH <sup>+</sup>                | C <sub>5</sub> H <sub>10</sub> O <sub>2</sub> | 3-hydroxy-3-methyl-2-butanone +<br>pentanoic acid (dehydrated ion)      |
| 85.101         | 10 <sup>5</sup> / 5x10 <sup>3</sup>   | C <sub>6</sub> H <sub>12</sub> H <sup>+</sup>                | C <sub>6</sub> H <sub>12</sub>                | 2,3DM2B                                                                 |
| 87.080         | 10 <sup>3</sup> / 5x10 <sup>3</sup>   | C <sub>5</sub> H <sub>10</sub> OH <sup>+</sup>               | C <sub>5</sub> H <sub>10</sub> O              | Pentanal                                                                |
| <b>97.065</b>  | 10 <sup>3</sup> / 10 <sup>3</sup>     | C <sub>6</sub> H <sub>8</sub> OH <sup>+</sup>                | C <sub>6</sub> H <sub>8</sub> O               | Product C <sub>5</sub> H <sub>11</sub> O <sub>2</sub> + 2,3DM2B         |
| 99.044         | 5x10 <sup>3</sup> / 5x10 <sup>3</sup> | C <sub>5</sub> H <sub>6</sub> O <sub>2</sub> H <sup>+</sup>  | C <sub>5</sub> H <sub>6</sub> O <sub>2</sub>  | Product RO <sub>2</sub> + 2,3DM2B                                       |
| 99.080         | 5x10 <sup>3</sup> / 5x10 <sup>3</sup> | C <sub>6</sub> H <sub>10</sub> OH <sup>+</sup>               | C <sub>6</sub> H <sub>10</sub> O              | Product RO <sub>2</sub> + 2,3DM2B                                       |
| 101.060        | 10 <sup>3</sup> / 10 <sup>4</sup>     | C <sub>5</sub> H <sub>8</sub> O <sub>2</sub> H <sup>+</sup>  | C <sub>5</sub> H <sub>10</sub> O <sub>3</sub> | Fragment, autoxidation C <sub>5</sub> H <sub>11</sub> O <sub>2</sub>    |
| 101.096        | 10 <sup>5</sup> / 10 <sup>4</sup>     | C <sub>6</sub> H <sub>12</sub> OH <sup>+</sup>               | C <sub>6</sub> H <sub>12</sub> O              | Tetramethyl oxirane + 210 isomers                                       |
| 103.075        | - / 10 <sup>3</sup>                   | C <sub>5</sub> H <sub>10</sub> O <sub>2</sub> H <sup>+</sup> | C <sub>5</sub> H <sub>10</sub> O <sub>2</sub> | 3-hydroxy-3-methyl-2-butanone +<br>pentanoic acid                       |
| 105.018        | - / 5x10 <sup>2</sup>                 | C <sub>3</sub> H <sub>4</sub> O <sub>4</sub> H <sup>+</sup>  | /                                             | Fragment, side-chemistry                                                |
| 105.033        | - / 10 <sup>2</sup>                   | C <sub>7</sub> H <sub>4</sub> OH <sup>+</sup>                | /                                             | Fragment, RO <sub>2</sub> + 2,3DM2B                                     |
| <b>125.096</b> | 5x10 <sup>2</sup> / 5x10 <sup>3</sup> | C <sub>8</sub> H <sub>12</sub> OH <sup>+</sup>               | /                                             | Product C <sub>5</sub> H <sub>11</sub> O <sub>2</sub> + 2,3DM2B         |
| 126.9          | 10 <sup>3</sup> / 5x10 <sup>3</sup>   | I <sup>+</sup>                                               | I                                             | Iodine atom                                                             |
| <b>127.112</b> | 5x10 <sup>2</sup> / 10 <sup>3</sup>   | C <sub>8</sub> H <sub>14</sub> OH <sup>+</sup>               | /                                             | Product C <sub>5</sub> H <sub>11</sub> O <sub>2</sub> + 2,3DM2B         |
| <b>139.075</b> | 10 <sup>3</sup> / 5x10 <sup>3</sup>   | C <sub>8</sub> H <sub>10</sub> O <sub>2</sub> H <sup>+</sup> | /                                             | Product C <sub>5</sub> H <sub>11</sub> O <sub>2</sub> + 2,3DM2B         |
| 253.82         | - / 5x10 <sup>3</sup>                 | I <sub>2</sub> <sup>+</sup>                                  | I <sub>2</sub>                                | di-Iodine                                                               |

**Table S3:** Main ions in the experiments C<sub>5</sub>H<sub>11</sub>O<sub>2</sub> + isoprene.

| <i>m/z</i>     | Intensity<br>(Baseline/Product)       | Ion sum<br>formula                                           | Neutral sum<br>formula                        | Interpretation and comments                                             |
|----------------|---------------------------------------|--------------------------------------------------------------|-----------------------------------------------|-------------------------------------------------------------------------|
| 19.018         | 10 <sup>5</sup> / -                   | H <sub>3</sub> O <sup>+</sup>                                | H <sub>2</sub> O                              | Source                                                                  |
| 31.018         | 5x10 <sup>3</sup> / 10 <sup>3</sup>   | CH <sub>2</sub> OH <sup>+</sup>                              | CH <sub>2</sub> O                             | Formaldehyde, product                                                   |
| 43.018         | 5x10 <sup>4</sup> / 10 <sup>4</sup>   | C <sub>2</sub> H <sub>2</sub> OH <sup>+</sup>                | C <sub>2</sub> H <sub>4</sub> O <sub>2</sub>  | Fragment of C <sub>2</sub> H <sub>4</sub> O <sub>2</sub> H <sup>+</sup> |
| 45.033         | 5x10 <sup>3</sup> / 10 <sup>4</sup>   | C <sub>2</sub> H <sub>4</sub> OH <sup>+</sup>                | C <sub>2</sub> H <sub>4</sub> O               | Acetaldehyde, product side-chemistry                                    |
| 55.018         | 10 <sup>3</sup> / 5x10 <sup>2</sup>   | C <sub>3</sub> H <sub>2</sub> OH <sup>+</sup>                | /                                             | Fragment, side-chemistry                                                |
| 59.049         | 5x10 <sup>4</sup> / 2x10 <sup>3</sup> | C <sub>3</sub> H <sub>6</sub> OH <sup>+</sup>                | C <sub>3</sub> H <sub>6</sub> O               | Acetone, product                                                        |
| 61.028         | 5x10 <sup>3</sup> / 5x10 <sup>3</sup> | C <sub>2</sub> H <sub>4</sub> O <sub>2</sub> H <sup>+</sup>  | C <sub>2</sub> H <sub>4</sub> O <sub>2</sub>  | Acetic acid/hydroxyacetaldehyde, product side-chemistry                 |
| 69.070         | 10 <sup>5</sup> / 10 <sup>4</sup>     | C <sub>5</sub> H <sub>8</sub> H <sup>+</sup>                 | C <sub>5</sub> H <sub>8</sub>                 | isoprene                                                                |
| 71.049         | 10 <sup>4</sup> / 5x10 <sup>3</sup>   | C <sub>4</sub> H <sub>6</sub> OH <sup>+</sup>                | C <sub>4</sub> H <sub>6</sub> O               | MACR or MVK                                                             |
| 73.028         | 10 <sup>3</sup> / 10 <sup>3</sup>     | C <sub>3</sub> H <sub>4</sub> O <sub>2</sub> H <sup>+</sup>  | C <sub>3</sub> H <sub>4</sub> O <sub>2</sub>  | Product side-chemistry                                                  |
| 83.049         | 5x10 <sup>3</sup> / 5x10 <sup>3</sup> | C <sub>5</sub> H <sub>6</sub> OH <sup>+</sup>                | C <sub>5</sub> H <sub>8</sub> O <sub>2</sub>  | 2-hydroxy-2-methyl-3-butenal (dehydrated ion)                           |
| 85.065         | 10 <sup>4</sup> / 5x10 <sup>3</sup>   | C <sub>5</sub> H <sub>8</sub> OH <sup>+</sup>                | C <sub>5</sub> H <sub>8</sub> O               | Isoprene epoxide                                                        |
| 87.080         | 5x10 <sup>2</sup> / 10 <sup>3</sup>   | C <sub>5</sub> H <sub>10</sub> OH <sup>+</sup>               | C <sub>5</sub> H <sub>10</sub> O              | Pentanal                                                                |
| 101.060        | 10 <sup>3</sup> / 5x10 <sup>3</sup>   | C <sub>5</sub> H <sub>8</sub> O <sub>2</sub> H <sup>+</sup>  | C <sub>5</sub> H <sub>8</sub> O <sub>2</sub>  | 2-hydroxy-2-methyl-3-butenal                                            |
| 103.075        | 10 <sup>2</sup> / 10 <sup>3</sup>     | C <sub>5</sub> H <sub>10</sub> O <sub>2</sub> H <sup>+</sup> | C <sub>5</sub> H <sub>10</sub> O <sub>2</sub> | Pentanoic acid, product side-chemistry                                  |
| 105.018        | 50 / 10 <sup>2</sup>                  | C <sub>3</sub> H <sub>4</sub> O <sub>4</sub> H <sup>+</sup>  | /                                             | Product side-chemistry                                                  |
| 107.034        | 50 / 10 <sup>2</sup>                  | C <sub>3</sub> H <sub>6</sub> O <sub>4</sub> H <sup>+</sup>  | C <sub>3</sub> H <sub>6</sub> O <sub>4</sub>  | Product side-chemistry                                                  |
| 111.080        | 10 <sup>2</sup> / 10 <sup>2</sup>     | C <sub>7</sub> H <sub>10</sub> O <sub>4</sub> H <sup>+</sup> | C <sub>7</sub> H <sub>10</sub> O <sub>4</sub> | Product side-chemistry                                                  |
| 113.023        | 5x10 <sup>2</sup> / 10 <sup>2</sup>   | C <sub>5</sub> H <sub>4</sub> O <sub>3</sub> H <sup>+</sup>  | C <sub>5</sub> H <sub>4</sub> O <sub>3</sub>  | Product side-chemistry                                                  |
| 115.039        | 10 <sup>2</sup> / 10 <sup>2</sup>     | C <sub>5</sub> H <sub>6</sub> O <sub>3</sub> H <sup>+</sup>  | C <sub>5</sub> H <sub>6</sub> O <sub>3</sub>  | Product side-chemistry                                                  |
| 117.055        | 50 / 10 <sup>2</sup>                  | C <sub>5</sub> H <sub>8</sub> O <sub>3</sub> H <sup>+</sup>  | C <sub>5</sub> H <sub>8</sub> O <sub>3</sub>  | HPALD                                                                   |
| <b>119.034</b> | 50 / 10 <sup>2</sup>                  | C <sub>4</sub> H <sub>6</sub> O <sub>4</sub> H <sup>+</sup>  | /                                             | Product C <sub>5</sub> H <sub>11</sub> O <sub>2</sub> + isoprene        |
| 121.028        | 10 <sup>2</sup> / 10 <sup>2</sup>     | C <sub>7</sub> H <sub>4</sub> O <sub>2</sub> H <sup>+</sup>  | C <sub>7</sub> H <sub>4</sub> O <sub>2</sub>  | Product                                                                 |
| <b>123.117</b> | 5x10 <sup>2</sup> / 5x10 <sup>2</sup> | C <sub>9</sub> H <sub>14</sub> H <sup>+</sup>                | /                                             | Fragment C <sub>5</sub> H <sub>11</sub> O <sub>2</sub> + isoprene       |
| 126.9          | 5x10 <sup>3</sup> / 5x10 <sup>3</sup> | I <sup>+</sup>                                               | I                                             | Iodine atom                                                             |
| 253.82         | - / 5x10 <sup>3</sup>                 | I <sub>2</sub> <sup>+</sup>                                  | I <sub>2</sub>                                | di-Iodine                                                               |

**Table S4:** Main ions in the experiments CH<sub>3</sub>O<sub>2</sub> + 2,3DM2B.

| <i>m/z</i>    | Intensity<br>(Baseline/Product)       | Ion sum<br>formula                                          | Neutral sum<br>formula                        | Interpretation and comments                                             |
|---------------|---------------------------------------|-------------------------------------------------------------|-----------------------------------------------|-------------------------------------------------------------------------|
| 19.018        | 10 <sup>5</sup> / -                   | H <sub>3</sub> O <sup>+</sup>                               | H <sub>2</sub> O                              | Source                                                                  |
| 31.018        | 5x10 <sup>3</sup> / 10 <sup>4</sup>   | CH <sub>2</sub> OH <sup>+</sup>                             | CH <sub>2</sub> O                             | Formaldehyde, product                                                   |
| 43.018        | 5x10 <sup>4</sup> / 5x10 <sup>3</sup> | C <sub>2</sub> H <sub>2</sub> OH <sup>+</sup>               | C <sub>2</sub> H <sub>4</sub> O <sub>2</sub>  | Fragment of C <sub>2</sub> H <sub>4</sub> O <sub>2</sub> H <sup>+</sup> |
| 45.033        | 5x10 <sup>3</sup> / 10 <sup>3</sup>   | C <sub>2</sub> H <sub>4</sub> OH <sup>+</sup>               | C <sub>2</sub> H <sub>4</sub> O               | Acetaldehyde, product side-chemistry                                    |
| 47.013        | 10 <sup>3</sup> / 10 <sup>3</sup>     | CH <sub>2</sub> O <sub>2</sub> H <sup>+</sup>               | CH <sub>2</sub> O <sub>2</sub>                | Formic acid, product side-chemistry CH <sub>3</sub> O <sub>2</sub>      |
| 47.049        | - / 10 <sup>3</sup>                   | C <sub>2</sub> H <sub>6</sub> OH <sup>+</sup>               | C <sub>2</sub> H <sub>6</sub> O               | Product side-chemistry CH <sub>3</sub> O <sub>2</sub>                   |
| 55.054        | 5x10 <sup>4</sup> / 10 <sup>4</sup>   | C <sub>4</sub> H <sub>6</sub> H <sup>+</sup>                | /                                             | Fragment, side-chemistry                                                |
| 59.049        | 5x10 <sup>4</sup> / 10 <sup>4</sup>   | C <sub>3</sub> H <sub>6</sub> OH <sup>+</sup>               | C <sub>3</sub> H <sub>6</sub> O               | Acetone, product RO <sub>2</sub> + 2,3DM2B                              |
| 61.028        | 5x10 <sup>3</sup> / 10 <sup>4</sup>   | C <sub>2</sub> H <sub>4</sub> O <sub>2</sub> H <sup>+</sup> | C <sub>2</sub> H <sub>4</sub> O <sub>2</sub>  | Acetic acid/hydroxyacetaldehyde, product side-chemistry                 |
| 73.065        | 10 <sup>3</sup> / 5x10 <sup>2</sup>   | C <sub>4</sub> H <sub>8</sub> OH <sup>+</sup>               | C <sub>4</sub> H <sub>8</sub> O               | Product side-chemistry                                                  |
| 81.070        | 5x10 <sup>3</sup> / 10 <sup>3</sup>   | C <sub>6</sub> H <sub>8</sub> H <sup>+</sup>                | /                                             | Fragment side-chemistry                                                 |
| 83.049        | 5x10 <sup>2</sup> / 5x10 <sup>2</sup> | C <sub>5</sub> H <sub>6</sub> OH <sup>+</sup>               | /                                             | Product side-chemistry                                                  |
| 83.086        | 10 <sup>4</sup> / 5x10 <sup>3</sup>   | C <sub>6</sub> H <sub>10</sub> H <sup>+</sup>               | /                                             | Fragment side-chemistry                                                 |
| <b>85.065</b> | 10 <sup>3</sup> / 10 <sup>3</sup>     | C <sub>5</sub> H <sub>8</sub> OH <sup>+</sup>               | C <sub>5</sub> H <sub>10</sub> O <sub>2</sub> | 2-methyl-2-hydroxy-2-butanone (dehydrated ion)                          |
| <b>97.101</b> | 10 <sup>2</sup> / 10 <sup>2</sup>     | C <sub>7</sub> H <sub>11</sub> H <sup>+</sup>               | C <sub>7</sub> H <sub>11</sub>                | Fragment CH <sub>3</sub> O <sub>2</sub> + 2,3DM2B                       |
| 126.9         | 10 <sup>5</sup> / 10 <sup>4</sup>     | I <sup>+</sup>                                              | I                                             | Iodine atom                                                             |
| 253.82        | 10 <sup>4</sup> / 5x10 <sup>4</sup>   | I <sub>2</sub> <sup>+</sup>                                 | I <sub>2</sub>                                | di-Iodine                                                               |

**Figure S5:** Time-profiles and variations of the main aldehydes with alkene concentration in the experiments.

a) and b): Time profiles for  $C_5H_{11}O_2$  + isoprene (Experiments Alk44); c) and d) Time profiles for  $CH_3O_2$  + 2,3DM2B (experiment Alk46); The shaded areas correspond to  $RO_2$  "ON" cycles. The dashed lines indicate different alkene concentrations (decreasing during the experiments, with the values given in Table S1). In all the experiments, the products were first studied at a reaction time of  $t = 17$  s (first part of the experiment), then at a reaction time of  $t = 53$  s (second part).e)-g) Variations of the aldehydes signal with alkene concentration.

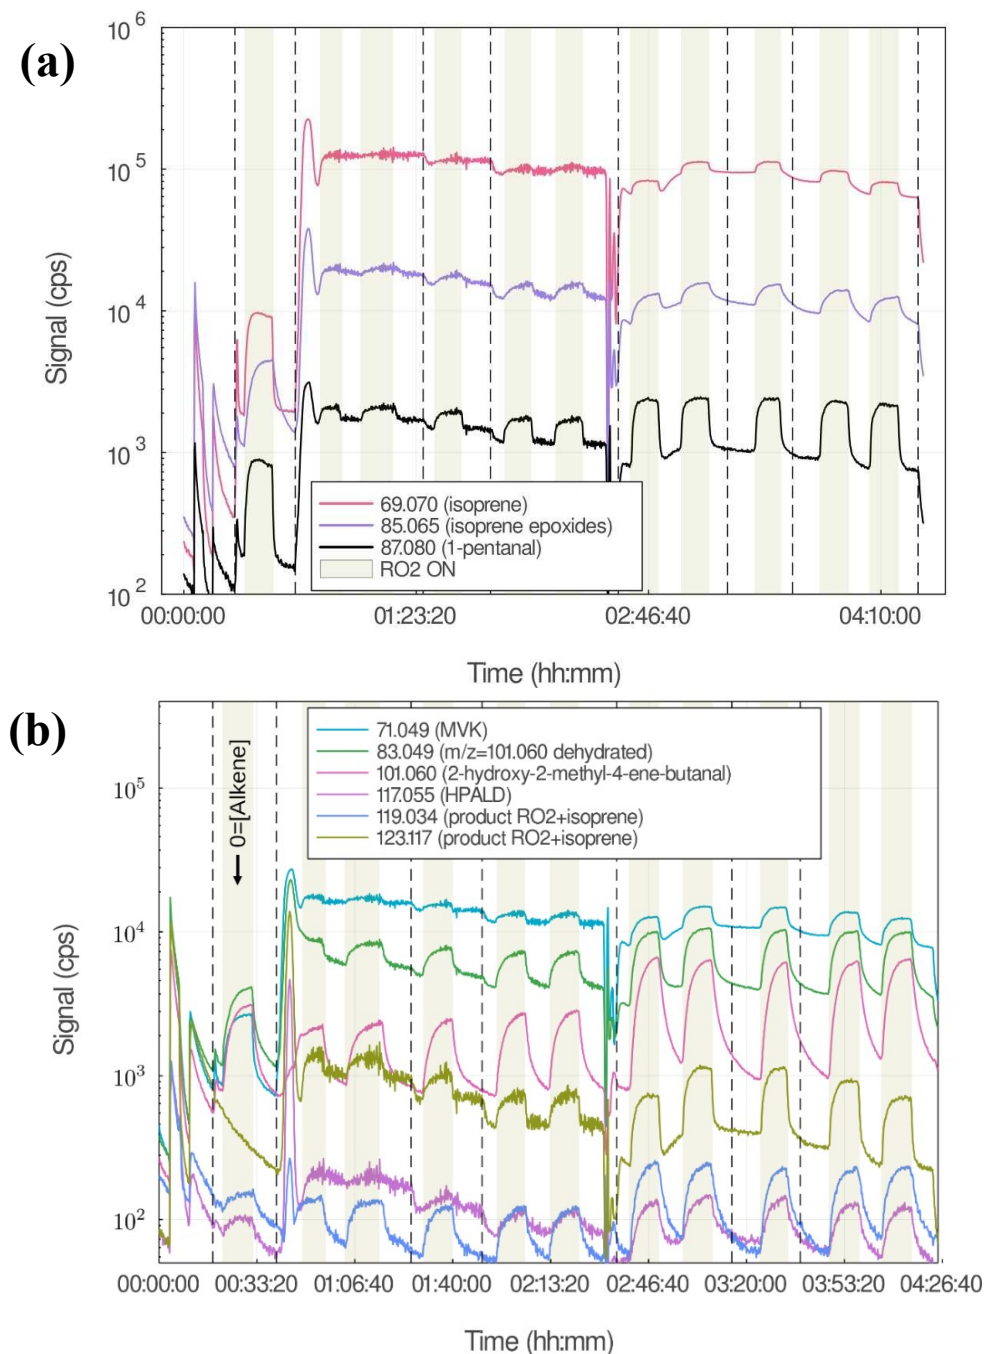

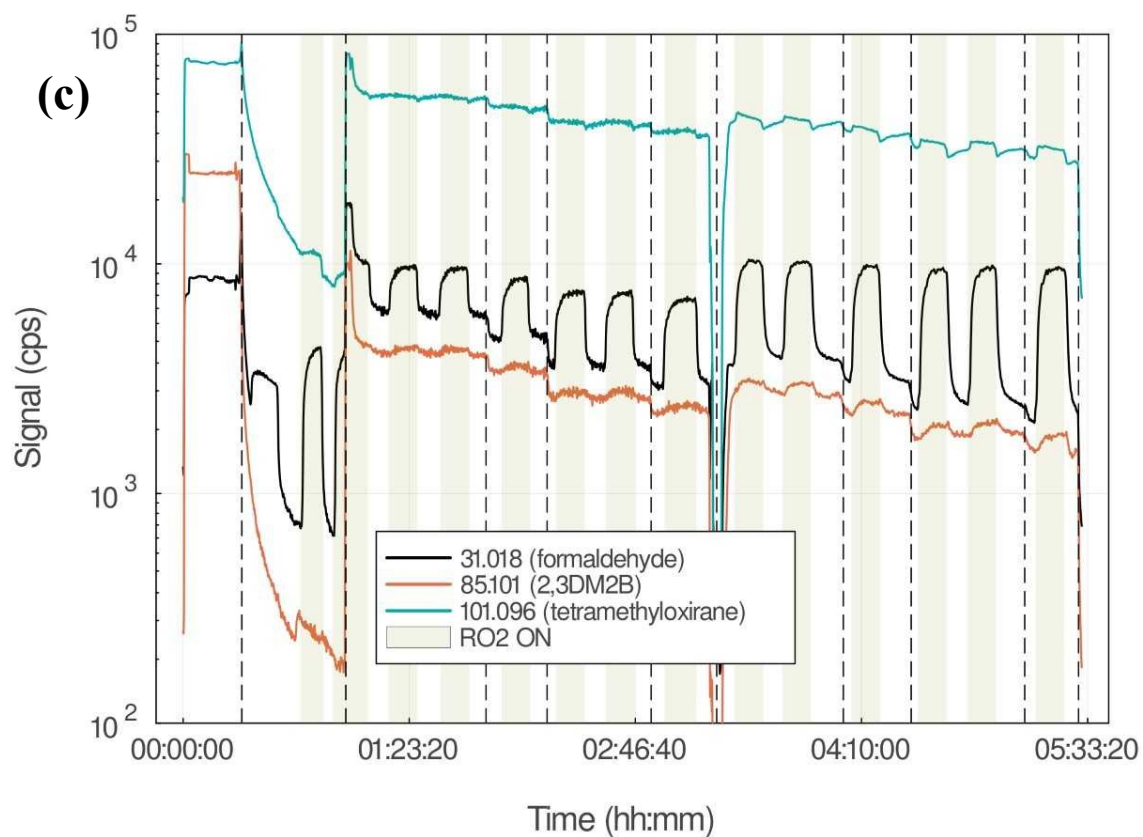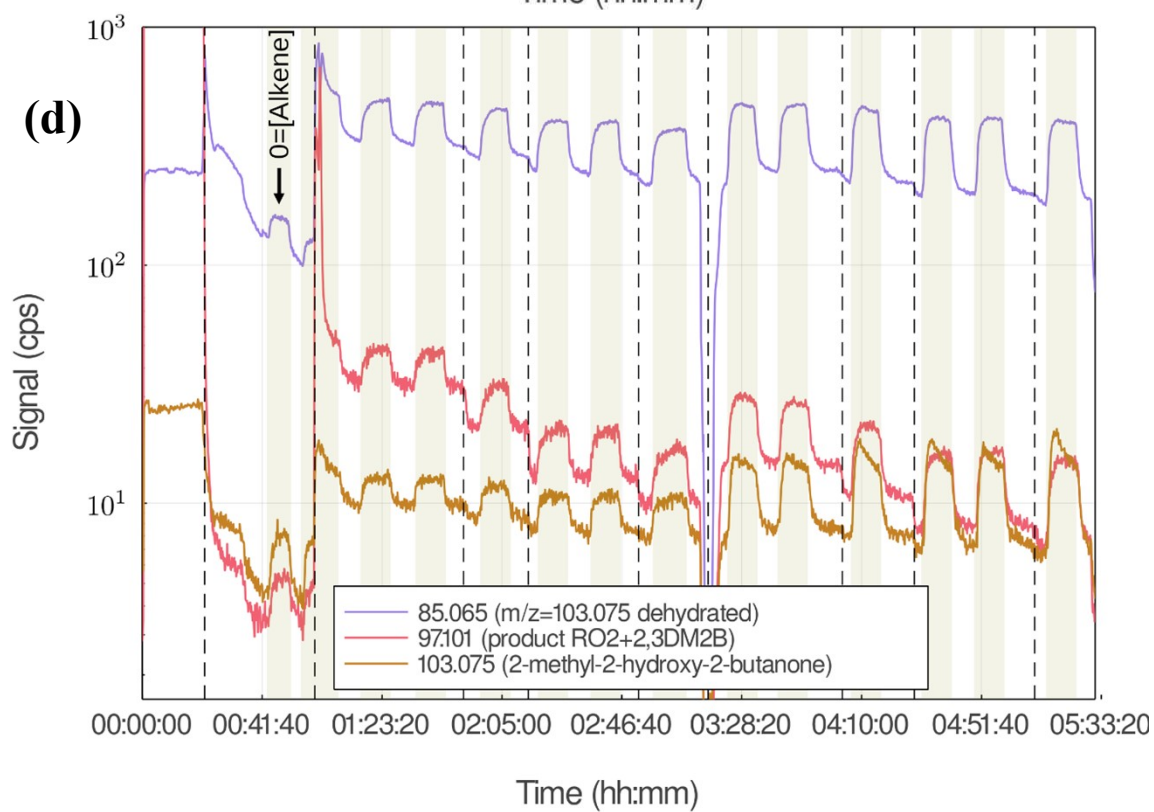

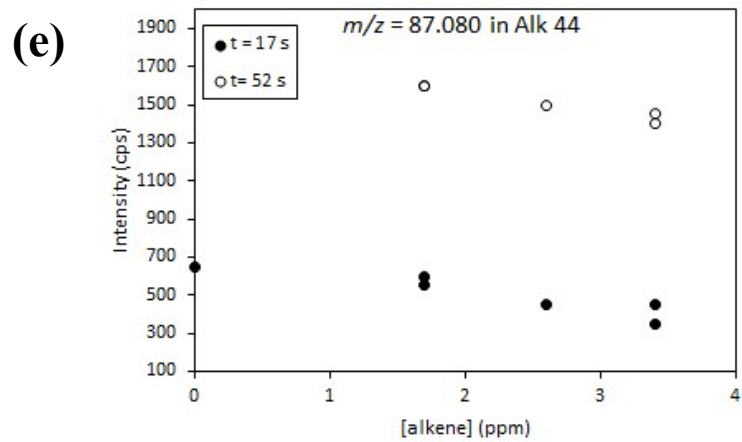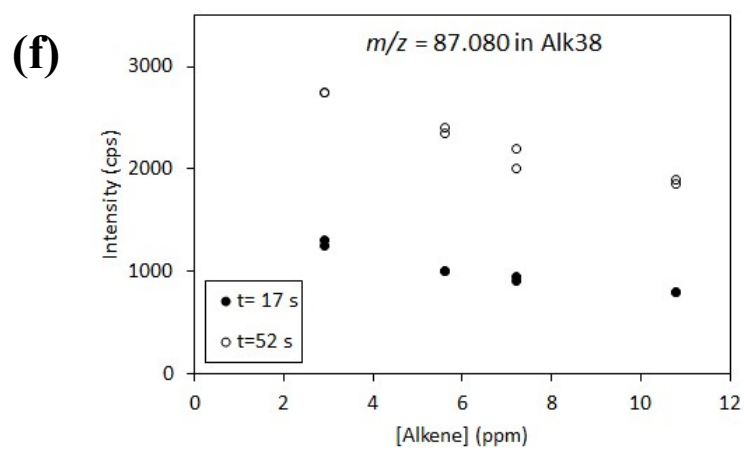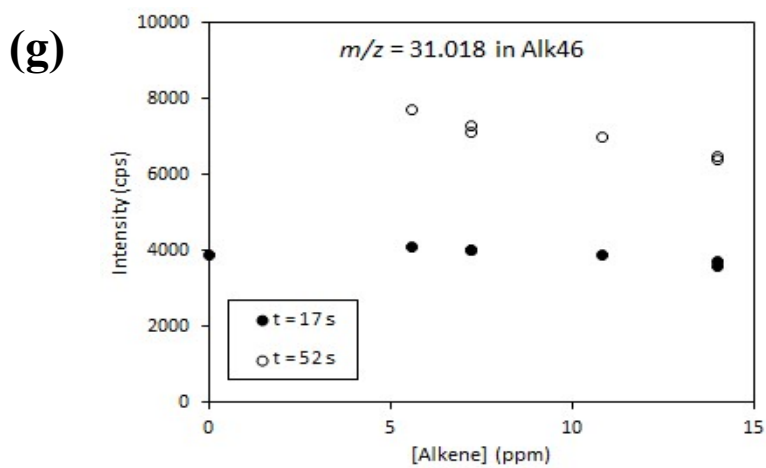



**Figure S6:** Chromatograms.

Chromatograms obtained in  $C_5H_{11}O_2 + 2,3DM2B$  experiment (Alk40, sample 4).

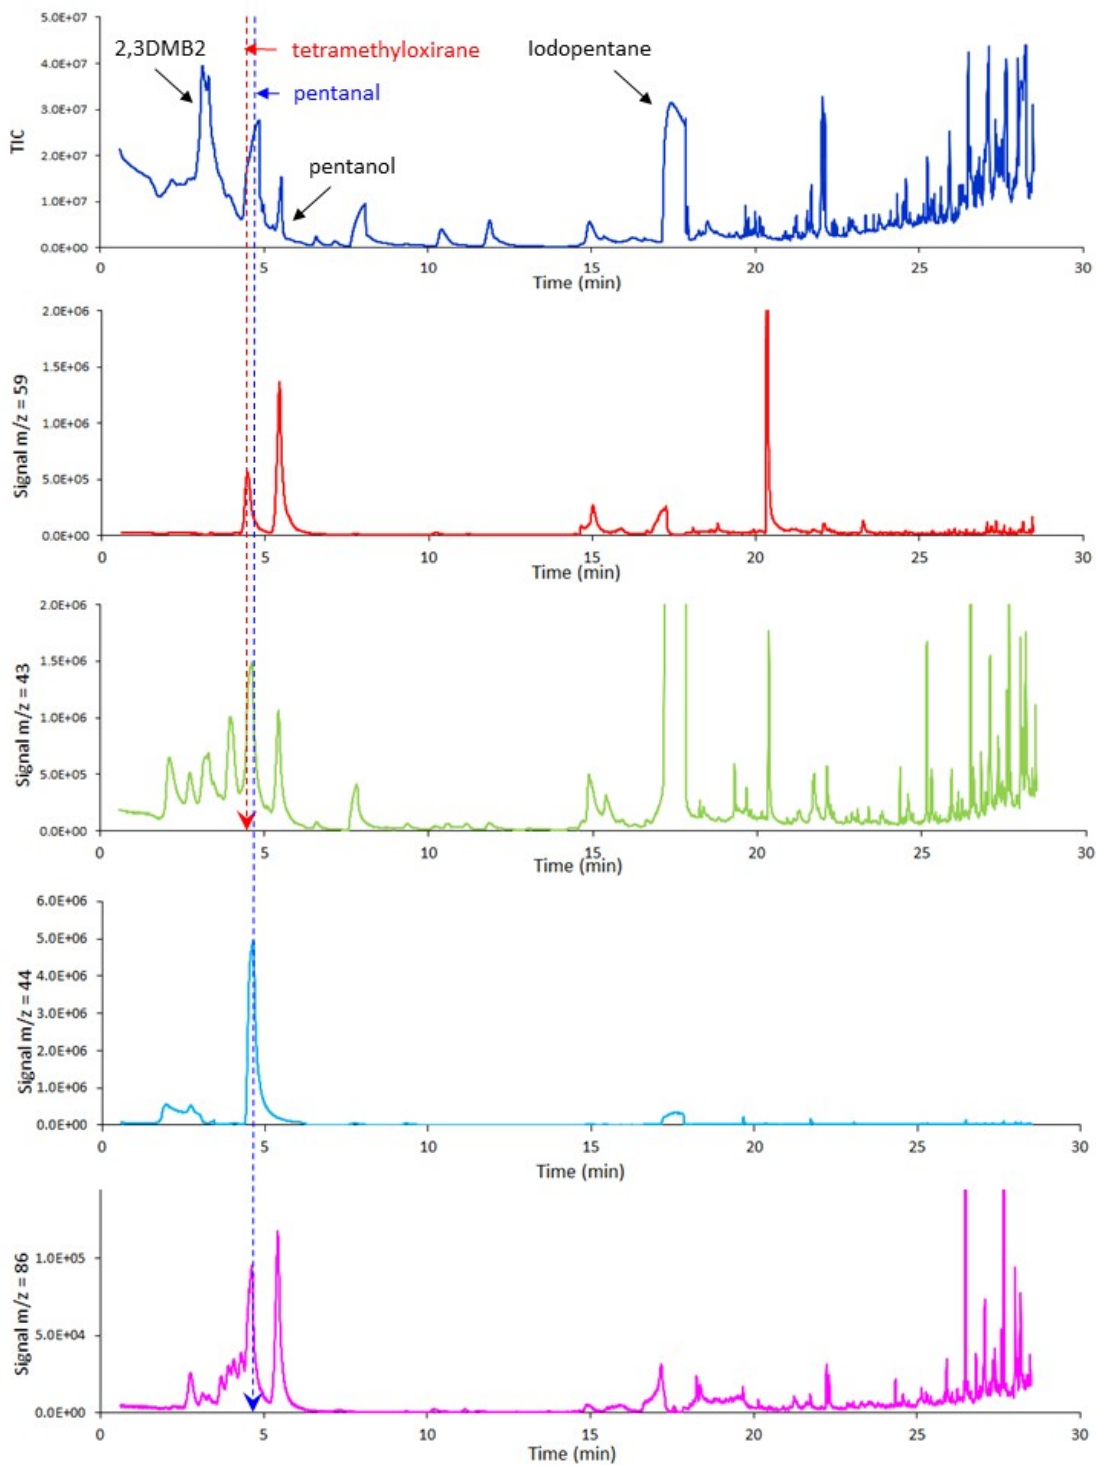

**Figure S7: GC/MS analysis:** Evolution of the concentration of 1-pentanal and tetramethyloxirane.

A) Pentanal at  $m/z = 44$  and 85. B) tetramethyl oxirane at  $m/z = 59$ . Data are averaged between Alk39 and Alk40 and error bars represent the dispersion between the results. [A] = alkene concentration.

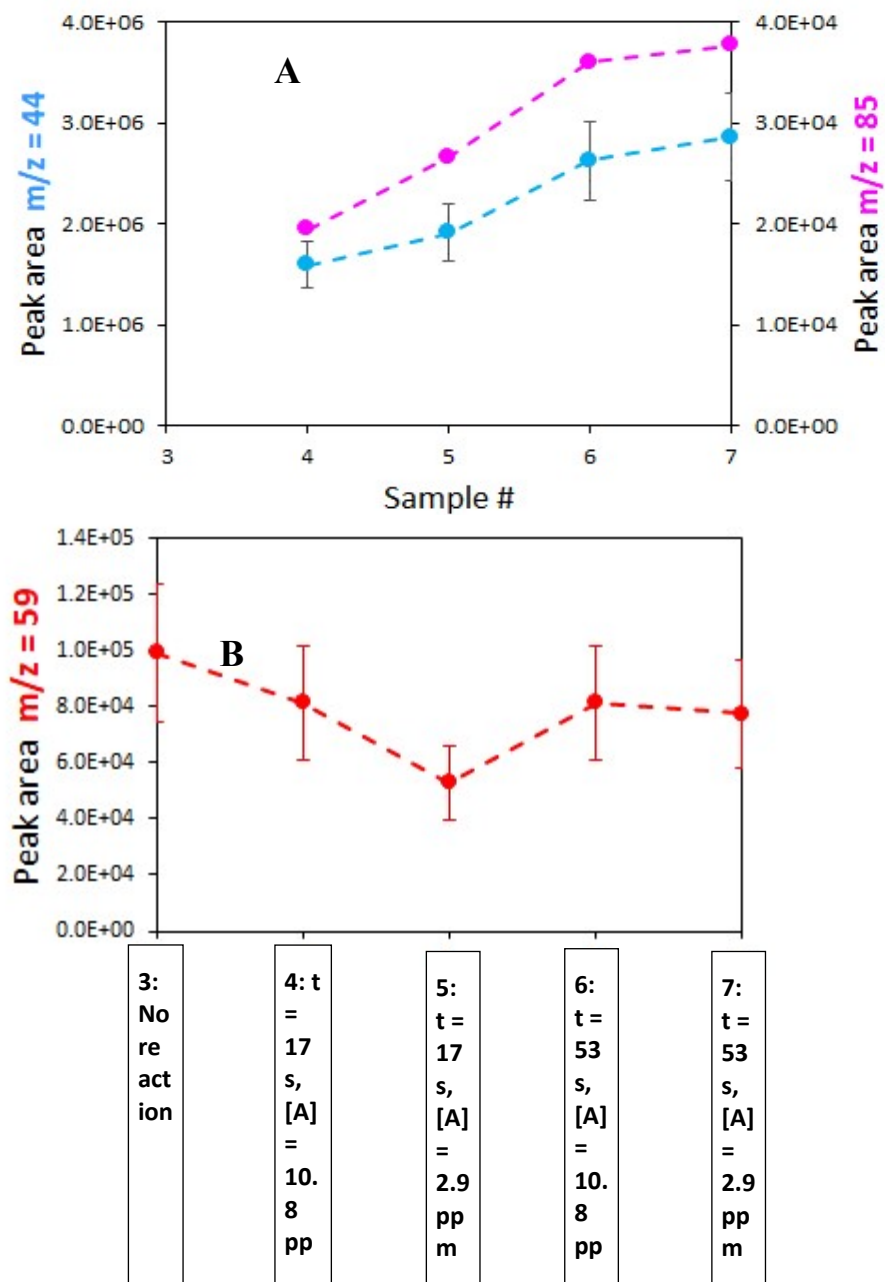

## Section S8: Kinetic simulations

Kinetic simulations were performed to determine the amount of epoxide expected if RO2+alkene proceeded entirely by the epoxide channel, as suggested in the literature. As in our previous study, ChemSimul V3.90 was used and with the rate coefficients summarized in Table S8.1. The results are presented in Table S8.2, where  $\Delta[\text{alkene}]$  is the amount of alkene consumed and “HOOQO<sub>2</sub>” the sum of the autoxidation products for C<sub>5</sub>H<sub>11</sub>O<sub>2</sub>.

**Estimation of the detection sensitivity for the epoxides:** The detection sensitivity for the epoxides,  $S_0$  (cps/ppb) was estimated by considering the background concentration of tetramethyloxirane in Alk38 before reaction. This background signal was  $S \sim 100000$  cps (Fig. 3 and above) for a concentration of tetramethyloxirane of 0.2 %  $\times 2.7 \times 10^{14} = 5.4 \times 10^{11}$  cm<sup>-3</sup> (22 ppb). Thus,  $S_0 \sim 4630$  cps/ppb, which can be rounded up to 5000 cps/ppb and is typical for oxygenated compounds detected by PTR-MS.

**Table S8.1:** Rate coefficients used in the simulations

| Rate coefficients                                                     | HO <sub>2</sub>       | CH <sub>3</sub> O <sub>2</sub> | C <sub>5</sub> H <sub>11</sub> O <sub>2</sub> |
|-----------------------------------------------------------------------|-----------------------|--------------------------------|-----------------------------------------------|
| $k_{self}$ (cm <sup>3</sup> s <sup>-1</sup> )                         | $1.6 \times 10^{-12}$ | $3.5 \times 10^{-13}$          | $4.0 \times 10^{-13}$                         |
| $k_{HO_2}$ (cm <sup>3</sup> s <sup>-1</sup> )                         | /                     | $5.2 \times 10^{-12}$          | $1 \times 10^{-11}$                           |
| $k_{iso}$ (s <sup>-1</sup> )                                          | /                     | /                              | $2.4 \times 10^{-3}$                          |
| $k_{wall}$ (s <sup>-1</sup> )                                         | $3 \times 10^{-3}$    | $3 \times 10^{-3}$             | $3 \times 10^{-3}$                            |
| $k_{alk}$ (cm <sup>3</sup> s <sup>-1</sup> )<br>isoprene              | $1.7 \times 10^{-19}$ | /                              | $8.0 \times 10^{-18}$                         |
| $k_{alk}$ (cm <sup>3</sup> s <sup>-1</sup> )<br>2,3-dimethyl-2-butene | $3.7 \times 10^{-19}$ | $6.7 \times 10^{-18}$          | $1.6 \times 10^{-16}$                         |

**Table S8.2:** Results of the kinetic simulations

All concentrations are in cm<sup>-3</sup>. The data highlighted in yellow correspond to reaction times close to those studied in the experiments.

| C <sub>5</sub> H <sub>11</sub> O <sub>2</sub> + 2,3DM2B (Alk38) |                                                  |              |                    |                       |           |          |                         |
|-----------------------------------------------------------------|--------------------------------------------------|--------------|--------------------|-----------------------|-----------|----------|-------------------------|
| Time (s)                                                        | [C <sub>5</sub> H <sub>11</sub> O <sub>2</sub> ] | [1-pentanal] | [HO <sub>2</sub> ] | [HOOQO <sub>2</sub> ] | [Epoxide] | [Alkene] | $\Delta[\text{alkene}]$ |
| 0                                                               | 2.50E+12                                         | 0.00E+00     | 0.00E+00           | 0.00E+00              | 0.00E+00  | 3.00E+14 |                         |
| 6                                                               | 9.69E+10                                         | 1.21E+12     | 9.58E+09           | 5.55E+09              | 1.11E+11  | 3.00E+14 | 1.10E+11                |
| 12                                                              | 3.51E+10                                         | 1.24E+12     | 6.59E+09           | 6.39E+09              | 1.28E+11  | 3.00E+14 | 1.30E+11                |
| 18                                                              | 1.63E+10                                         | 1.25E+12     | 5.58E+09           | 6.74E+09              | 1.35E+11  | 3.00E+14 | 1.30E+11                |
| 24                                                              | 8.37E+09                                         | 1.25E+12     | 5.04E+09           | 6.91E+09              | 1.38E+11  | 3.00E+14 | 1.40E+11                |
| 30                                                              | 4.51E+09                                         | 1.26E+12     | 4.66E+09           | 7.00E+09              | 1.40E+11  | 3.00E+14 | 1.40E+11                |
| 36                                                              | 2.51E+09                                         | 1.26E+12     | 4.35E+09           | 7.05E+09              | 1.41E+11  | 3.00E+14 | 1.40E+11                |
| 42                                                              | 1.43E+09                                         | 1.26E+12     | 4.08E+09           | 7.08E+09              | 1.42E+11  | 3.00E+14 | 1.40E+11                |
| 48                                                              | 8.28E+08                                         | 1.26E+12     | 3.84E+09           | 7.10E+09              | 1.42E+11  | 3.00E+14 | 1.40E+11                |
| 54                                                              | 4.88E+08                                         | 1.26E+12     | 3.61E+09           | 7.10E+09              | 1.42E+11  | 3.00E+14 | 1.40E+11                |
| 60                                                              | 2.92E+08                                         | 1.26E+12     | 3.40E+09           | 7.11E+09              | 1.42E+11  | 3.00E+14 | 1.40E+11                |

| C <sub>5</sub> H <sub>11</sub> O <sub>2</sub> + isoprene (Alk44) |                                                  |              |                    |                       |           |          |           |
|------------------------------------------------------------------|--------------------------------------------------|--------------|--------------------|-----------------------|-----------|----------|-----------|
| Time (s)                                                         | [C <sub>5</sub> H <sub>11</sub> O <sub>2</sub> ] | [1-pentanal] | [HO <sub>2</sub> ] | [HOOQO <sub>2</sub> ] | [Epoxide] | [Alkene] | Δ[Alkene] |
| 0                                                                | 2.50E+12                                         | 0.00E+00     | 0.00E+00           | 0.00E+00              | 0.00E+00  | 9.00E+13 |           |
| 6                                                                | 1.27E+11                                         | 1.19E+12     | 6.89E+09           | 5.98E+09              | 2.24E+10  | 9.00E+13 | 2.20E+10  |
| 12                                                               | 6.09E+10                                         | 1.22E+12     | 3.81E+09           | 7.23E+09              | 2.71E+10  | 9.00E+13 | 2.70E+10  |
| 18                                                               | 3.83E+10                                         | 1.23E+12     | 2.75E+09           | 7.92E+09              | 2.97E+10  | 9.00E+13 | 3.00E+10  |
| 24                                                               | 2.70E+10                                         | 1.24E+12     | 2.22E+09           | 8.38E+09              | 3.14E+10  | 9.00E+13 | 3.10E+10  |
| 30                                                               | 2.02E+10                                         | 1.24E+12     | 1.90E+09           | 8.72E+09              | 3.27E+10  | 9.00E+13 | 3.30E+10  |
| 36                                                               | 1.57E+10                                         | 1.25E+12     | 1.69E+09           | 8.97E+09              | 3.36E+10  | 9.00E+13 | 3.40E+10  |
| 42                                                               | 1.26E+10                                         | 1.25E+12     | 1.54E+09           | 9.18E+09              | 3.44E+10  | 9.00E+13 | 3.40E+10  |
| 48                                                               | 1.02E+10                                         | 1.25E+12     | 1.43E+09           | 9.34E+09              | 3.50E+10  | 9.00E+13 | 3.50E+10  |
| 54                                                               | 8.46E+09                                         | 1.25E+12     | 1.34E+09           | 9.47E+09              | 3.55E+10  | 9.00E+13 | 3.60E+10  |
| 60                                                               | 7.08E+09                                         | 1.25E+12     | 1.27E+09           | 9.59E+09              | 3.59E+10  | 9.00E+13 | 3.60E+10  |
| CH <sub>3</sub> O <sub>2</sub> + 2,3DMB (Alk46)                  |                                                  |              |                    |                       |           |          |           |
| Time (s)                                                         | [CH <sub>3</sub> O <sub>2</sub> ]                | [HCHO]       | [HO <sub>2</sub> ] |                       | [Epoxide] | [Alkene] | Δ[Alkene] |
| 0                                                                | 5.00E+12                                         | 0.00E+00     | 0.00E+00           |                       | 0.00E+00  | 3.50E+14 |           |
| 6                                                                | 1.28E+11                                         | 2.47E+12     | 1.27E+10           |                       | 3.74E+10  | 3.50E+14 | 4.00E+10  |
| 12                                                               | 6.17E+10                                         | 2.49E+12     | 6.24E+09           |                       | 4.38E+10  | 3.50E+14 | 4.00E+10  |
| 18                                                               | 3.92E+10                                         | 2.50E+12     | 4.05E+09           |                       | 4.74E+10  | 3.50E+14 | 5.00E+10  |
| 24                                                               | 2.80E+10                                         | 2.50E+12     | 2.95E+09           |                       | 4.99E+10  | 3.50E+14 | 5.00E+10  |
| 30                                                               | 2.12E+10                                         | 2.51E+12     | 2.29E+09           |                       | 5.17E+10  | 3.50E+14 | 5.00E+10  |
| 36                                                               | 1.68E+10                                         | 2.51E+12     | 1.86E+09           |                       | 5.30E+10  | 3.50E+14 | 5.00E+10  |
| 42                                                               | 1.36E+10                                         | 2.51E+12     | 1.55E+09           |                       | 5.42E+10  | 3.50E+14 | 5.00E+10  |
| 48                                                               | 1.13E+10                                         | 2.51E+12     | 1.32E+09           |                       | 5.51E+10  | 3.50E+14 | 6.00E+10  |
| 54                                                               | 9.51E+09                                         | 2.51E+12     | 1.14E+09           |                       | 5.58E+10  | 3.50E+14 | 6.00E+10  |
| 60                                                               | 8.09E+09                                         | 2.51E+12     | 1.00E+09           |                       | 5.65E+10  | 3.50E+14 | 6.00E+10  |

Figure S9: NMR spectra for the 2,3DM2B and isoprene samples.

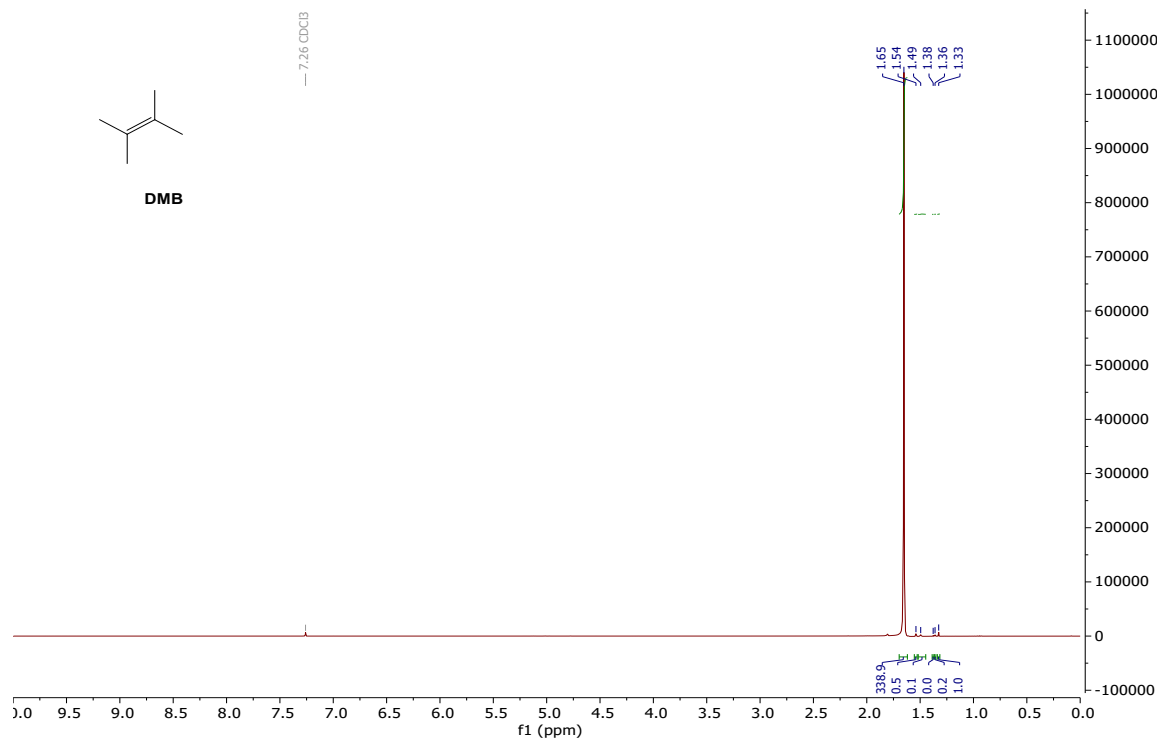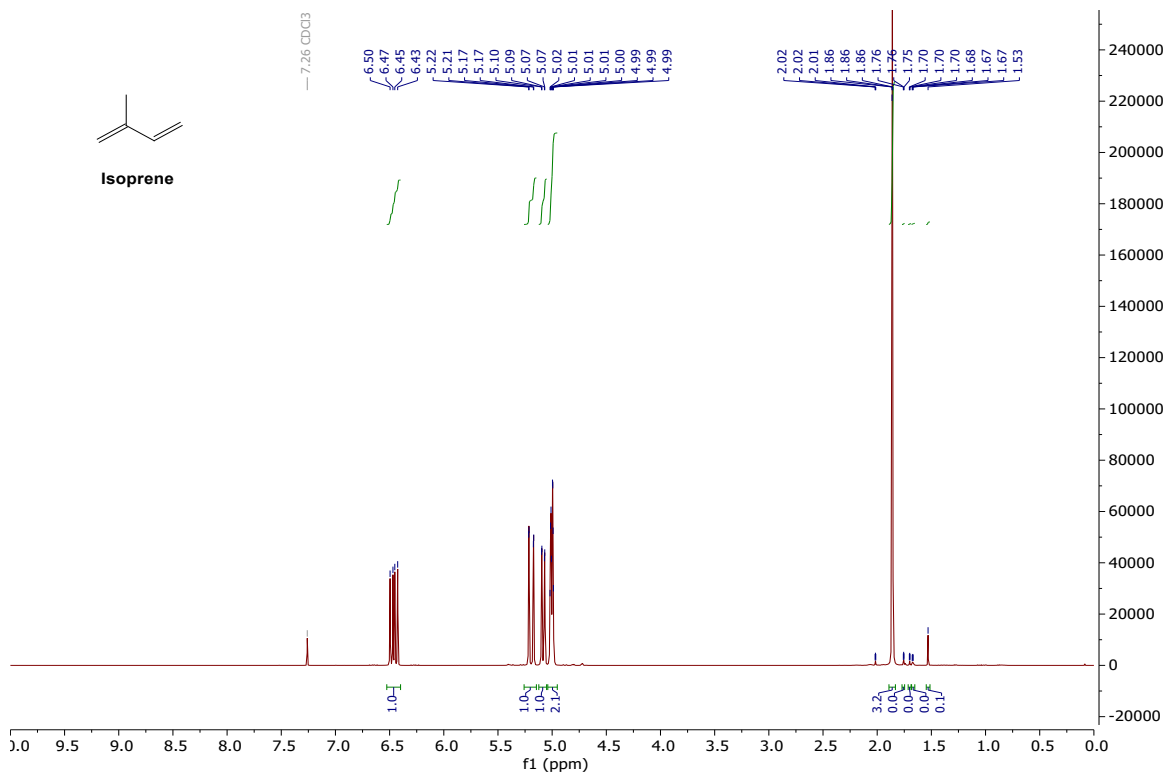

## Section S10: Kinetic analyses of the ion signals in the reactions RO<sub>2</sub> + alkene.

### A) Kinetic analyses

First-order kinetic analyses were applied to the most intense ion signals attributed to specific RO<sub>2</sub> + Alkene reactions (cf. Tables S2-S4 and discussion in the text). For this, the signal variations in the Light ON / Light OFF cycle ( $\Delta S$ ) were measured at the two reaction times explored ( $t_1 = 17$  s, achieved with a flow of 3 sLm and  $t_2 = 53$  s, achieved with a flow of 1 sLm) and for each alkene concentration. The rate coefficient for the formation of the corresponding product,  $k^{\text{II}}$  (cm<sup>3</sup> s<sup>-1</sup>), was then obtained by applying the equation:

$$\ln\left(1 - \frac{\Delta S_1}{\Delta S_2}\right) = k^{\text{II}} \times [\text{Alkene}] \times (t_2 - t_1) \quad (12).$$

Thus  $k^{\text{II}}$  was obtained from the slope of  $\ln(1 - \Delta S_1/\Delta S_2)$  as function of [alkene]. In the analyses of the experimental profiles  $\Delta S$  is measured from the relative baseline. The error bars reported in the plots below represent the uncertainties in measuring  $\Delta S_1$  and  $\Delta S_2$ .

### B) Results

Figure S10B1: Evolution of the ion  $m/z = 127.112$  in C<sub>5</sub>H<sub>11</sub>O<sub>2</sub> + 2,3DM2B experiment (Alk38).

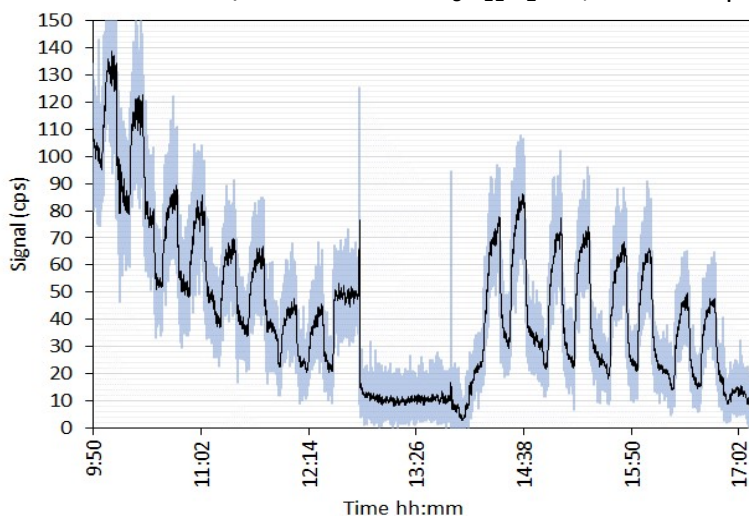

Figure S10B2: Kinetic plot for Fig. S10B1

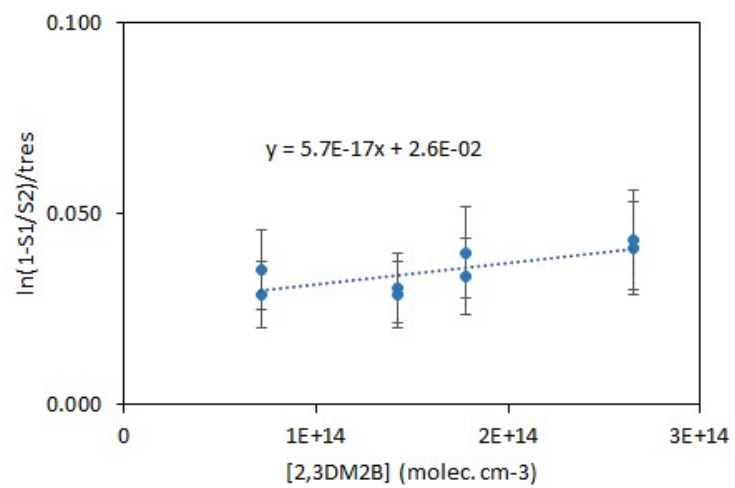

Figure S10B3: Evolution of the ion  $m/z = 119.034$  in  $C_5H_{11}O_2$  + isoprene experiment (Alk44).

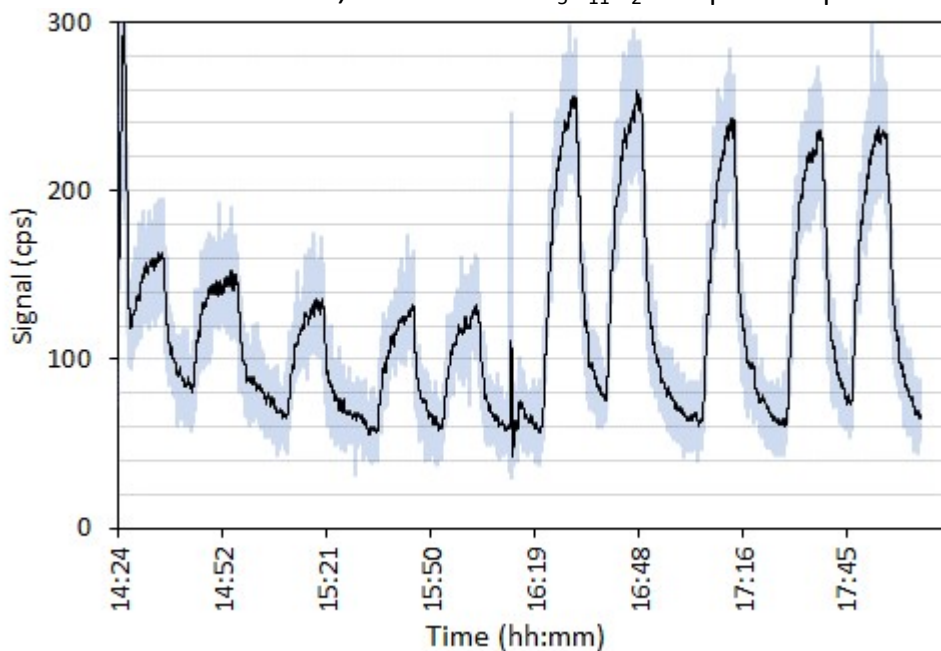

Figure S10B4: Kinetic plot for Fig. S10B3.

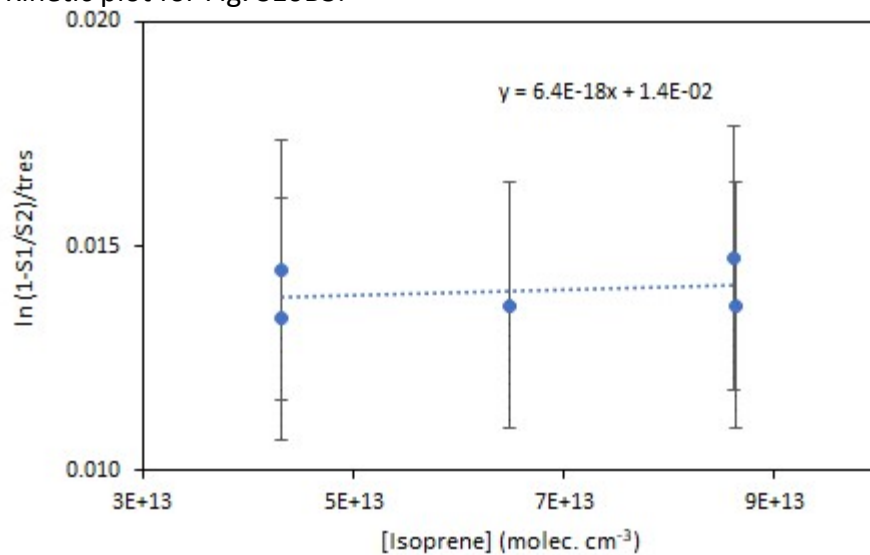



Figure S10B5: Evolution of the ion  $m/z = 85.065$  in  $\text{CH}_3\text{O}_2 + 2,3\text{DM2B}$  experiment (Alk46).

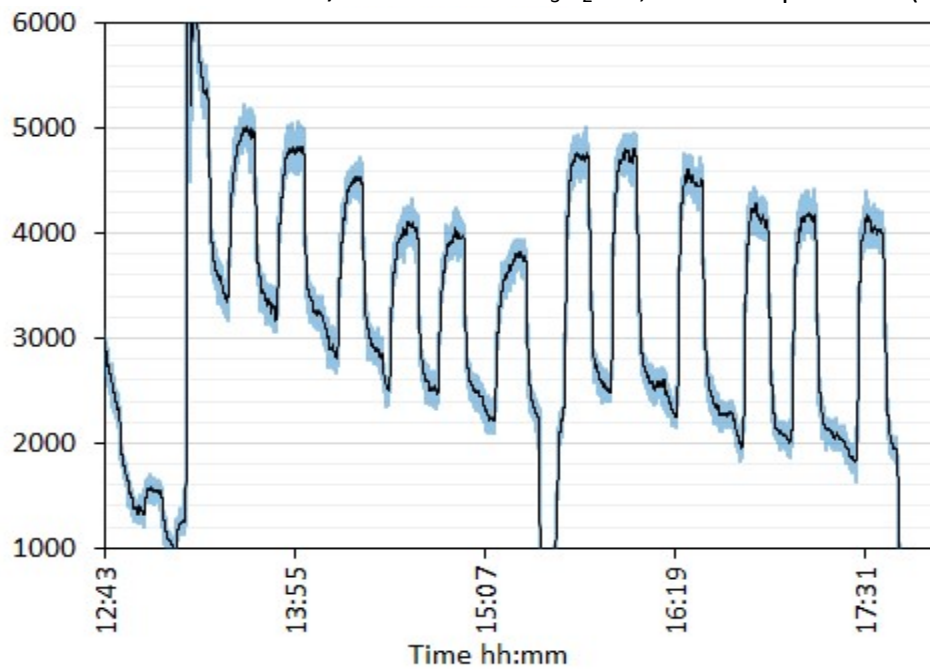

Figure S10B6: Kinetic plot for Fig. S10B5.

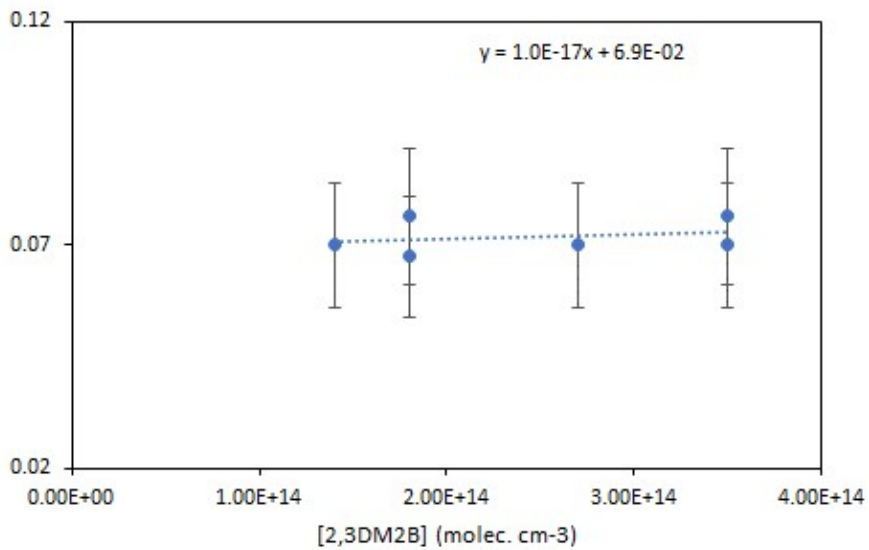

**Figure S11:** Chromatograms of potential reaction products.

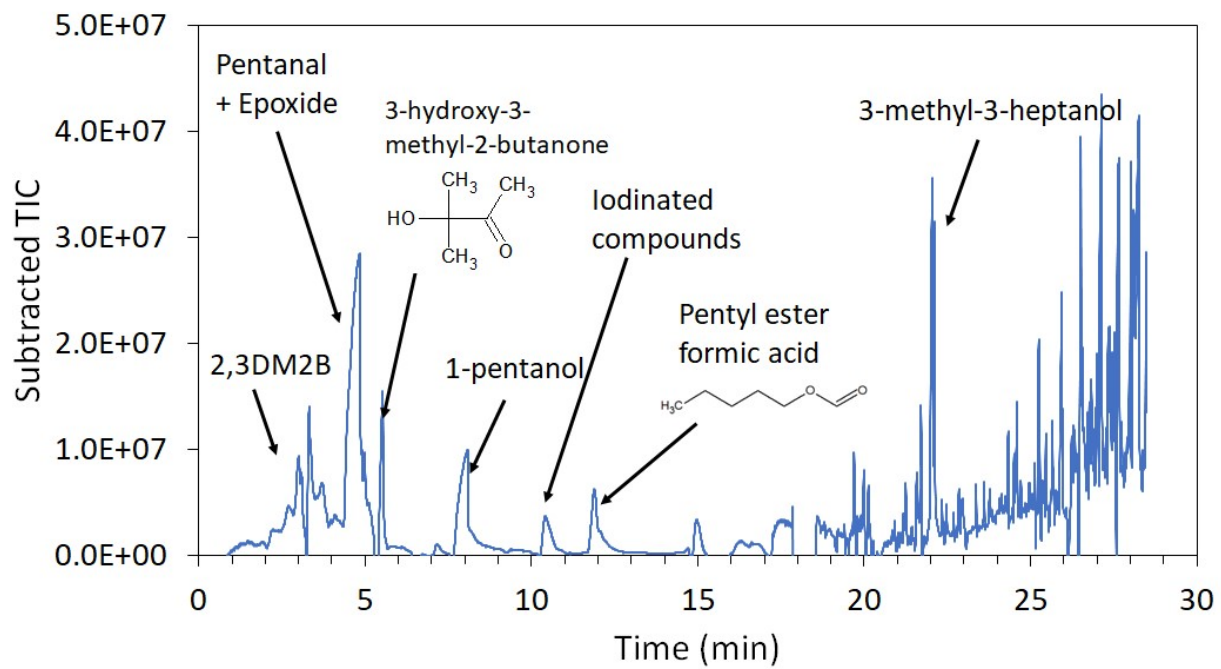

**Section S12:** Potential effects of RO<sub>2</sub>+alkene reactions in chamber experiments (kinetic simulations)

The potential impacts of RO<sub>2</sub>+alkene reactions in chamber experiments were examined by using the experiments of ref. 14 (oxidation of isoprene by OH under low NO<sub>x</sub> conditions) as an example. Simple kinetic simulations were performed using ChemSimul V3.90 and the reactions presented in Table S12.1. The kinetic system was run over 2h-cycles, mimicking the experiments of ref. 14, and kept as simple as possible to examine mostly the effects on the concentration of isoprene-RO<sub>2</sub> ("IsopRO<sub>2</sub>"), the total RO<sub>2</sub>, ΣRO<sub>2</sub>, and OH recycling. To determine a lower limit for the impact of RO<sub>2</sub>+isoprene, only one isoprene-RO<sub>2</sub> was considered, Z-δ-RO<sub>2</sub>-I, which has the fastest monomolecular sink rate ( $r_{mono} = 0.1$  or  $0.4 \text{ s}^{-1}$ , see justifications in ref. 14). The initial isoprene concentrations was set to 5 ppb, as in ref. 14 and the rate of photolytic production of OH was adjusted in the simulations to obtain OH concentrations comparable to those reported in ref. 14.

**Table S12.1:** Reactions and rate coefficients included in the simulations.

| Reaction                                                                              | Rate coefficients                                      | Comment                                                                          |
|---------------------------------------------------------------------------------------|--------------------------------------------------------|----------------------------------------------------------------------------------|
| (1) Precursor → OH                                                                    | $8 \times 10^5 \text{ cm}^{-3} \text{ s}^{-1}$         | Photolytic source for OH. Adjusted to fit [OH] to ref. 14                        |
| (2) Isoprene + OH → IsopOH                                                            | $1.0 \times 10^{-10} \text{ cm}^3 \text{ s}^{-1}$      |                                                                                  |
| (3) IsopOH + O <sub>2</sub> → IsopRO <sub>2</sub>                                     | $8.0 \times 10^{-12} \text{ cm}^3 \text{ s}^{-1}$      |                                                                                  |
| (4) IsopRO <sub>2</sub> → DHP-MVK + OH + CO                                           | 0.1 to $0.4 \text{ s}^{-1}$                            | Rates from ref. 14.                                                              |
| (5) IsopRO <sub>2</sub> + IsopRO <sub>2</sub> →<br>2 MVK + 2 HCHO + 2 HO <sub>2</sub> | $3.0 \times 10^{-12} \text{ cm}^3 \text{ s}^{-1}$      | Source for HO <sub>2</sub>                                                       |
| (6) IsopRO <sub>2</sub> + HO <sub>2</sub> → ISOPOOH + O <sub>2</sub>                  | $1.0 \times 10^{-11} \text{ cm}^3 \text{ s}^{-1}$      | Main sink for HO <sub>2</sub>                                                    |
| (7) IsopRO <sub>2</sub> + isoprene → C10RO <sub>2</sub>                               | 0 to $1.0 \times 10^{-14} \text{ cm}^3 \text{ s}^{-1}$ | Varied to study the impact of RO <sub>2</sub> +isoprene                          |
| (8) C10RO <sub>2</sub> → products                                                     | $1.0 \times 10^{-2} \text{ s}^{-1}$                    | Lumped sink rate assumed for the R'O <sub>2</sub> from RO <sub>2</sub> +isoprene |

**Figure S12.2:** Results of the simulations: concentrations profiles for isoprene-RO<sub>2</sub> (“IsopRO2”), ΣRO<sub>2</sub>, and OH, for two different sink rates for the radical Z-δ-RO<sub>2</sub>-I.

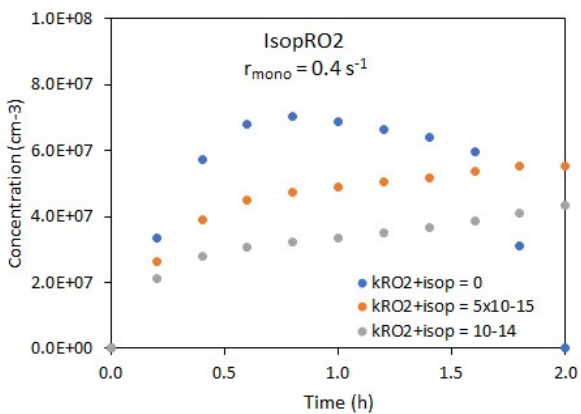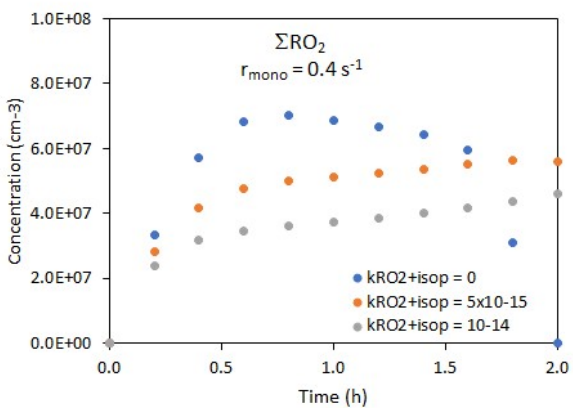

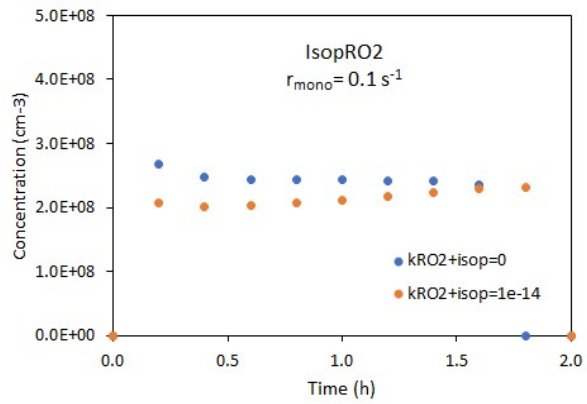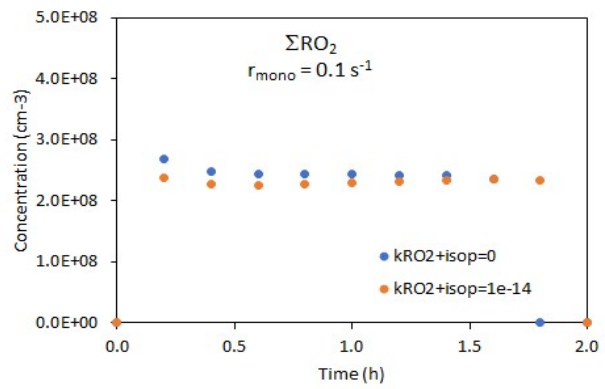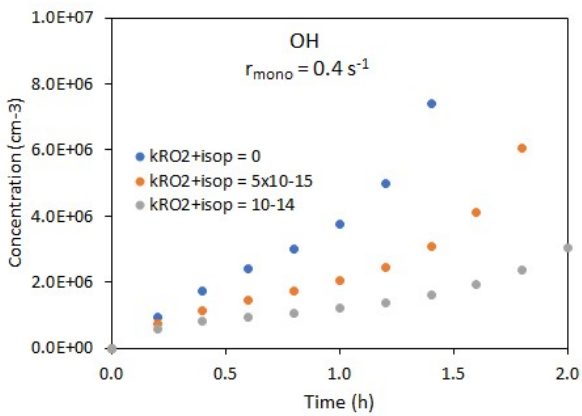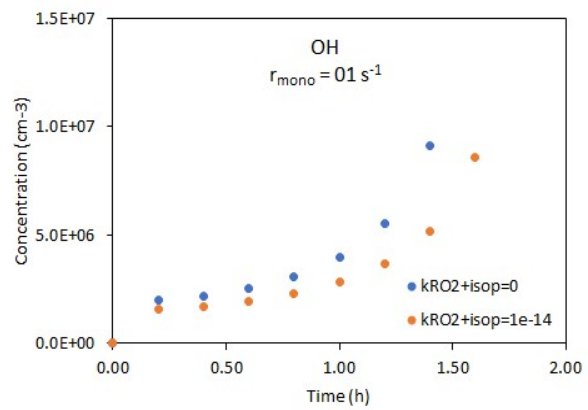

Supplement: d2cp05166d1.pdf [file d2cp05166d1.pdf]
